# Supplementary material for: Knowledge, Attitudes, and Practices on Tick-Borne Encephalitis Virus and Tick-Borne Diseases within Professionally Tick-Exposed Persons, Health Care Workers, and General Population in Serbia: A Questionnaire-Based Study
Source: MDPI journal article supplement (doi:10.3390/ijerph19020867), 2022-01-13
Supplement: s1 [file s1]

Supplementary Material S2. The questions on the knowledge and opinion towards ticks and tick-borne diseases and answers of the participants from three different groups.

| Question                                                                     | PTEP correct answers | HCW correct answers | GP correct answers | Total (positive answers; %; CI) | Group differences F(df=2), p |
|------------------------------------------------------------------------------|----------------------|---------------------|--------------------|---------------------------------|------------------------------|
| Did you hear for the term ARBOVIRUS?                                         | 123                  | 120                 | 100                | 343<br>(53.4)<br>[49.5-57.3]    | 57.917,<br>< 0.001           |
| Did you hear for the term ENDEMIC AREA?                                      | 190                  | 145                 | 275                | 610<br>(95.0)<br>[93.0-96.6]    | 3.496,<br>0.031              |
| Did you hear for TBE?                                                        | 164                  | 138                 | 188                | 490<br>(76.3)<br>[72.8-79.6]    | 30.550,<br>< 0.001           |
| Do you think that TBDs are widespread in Serbia?                             | 168                  | 116                 | 190                | 474<br>(73.8)<br>[70.2-77.2]    | 14.440,<br>< 0.001           |
| Do you know how many developmental stages ticks have?                        | 124                  | 86                  | 31                 | 241<br>(46.9)<br>[43.0-50.8]    | 31.704,<br>< 0.001           |
| Do you think that the infected tick can transmit TBEV in 12h after the bite? | 91                   | 84                  | 120                | 395<br>(46.0)<br>[42.0-49.9]    | 5.522,<br>0.004              |
| Do you think that TBE can lead to the lethal cause?                          | 139                  | 130                 | 174                | 443<br>(69.0)<br>[65.3-72.6]    | 21.496,<br>< 0.001           |
| Do you think there are registered TBE cases in Serbia?                       | 97                   | 92                  | 136                | 325<br>(50.6)<br>[46.7-54.6]    | 5.717,<br>0.003              |
| Do you know is there a vaccine against tick-borne encephalitis?              | 31                   | 42                  | 39                 | 112<br>(17.4)<br>[14.6-20.6]    | 8.619,<br>< 0.001            |
| Do you think that TBE is widespread in Europe?                               | 105                  | 79                  | 128                | 312<br>(48.6)<br>[44.7-52.5]    | 3.185,<br>0.042              |
| Do ticks transmit causative agents of Lyme borreliosis?                      | 191                  | 144                 | 261                | 596<br>(92.8)<br>[90.6-94.7]    | 9.439,<br>< 0.001            |
| Do ticks transmit WNV?                                                       | 119                  | 96                  | 172                | 387<br>(60.3)<br>[56.4-64.1]    | 1.075,<br>0.342              |
| Do ticks transmit CCHFV?                                                     | 41                   | 50                  | 31                 | 122<br>(19.0)<br>[16.0-22.3]    | 18.892,<br>< 0.001           |

|                                                                 |     |     |     |                               |                    |
|-----------------------------------------------------------------|-----|-----|-----|-------------------------------|--------------------|
| Do you think that only one tick species feed on humans?         | 169 | 130 | 197 | 496<br>77.3<br>[73.8-80.4]    | 19.211,<br>< 0.001 |
| Attached tick is being extracted using medical petrol by rules? | 138 | 112 | 148 | 398<br>(62.0)<br>[58.1-65.8]  | 18.541,<br>< 0.001 |
| Attached tick is being extracted using tweezers by rules?       | 150 | 114 | 190 | 454<br>(70.7)<br>[67.0-74.2]  | 5.824,<br>0.003    |
| An attached tick should be extracted in whole?                  | 192 | 144 | 292 | 628<br>(97.8)<br>[96.4-98.8]  | 1.317,<br>0.269    |
| Is each tick infected with some of the TBP's?                   | 176 | 135 | 223 | 534<br>(83.2)<br>[80.1-86.0]  | 12.849,<br>< 0.001 |
| Is the causative agent of TBE a bacterium?                      | 28  | 32  | 51  | 111<br>(17.3%)<br>[14.4-20.4] | 1.754,<br>0.174    |

---

TBE-tick-borne encephalitis, TBDs-tick-borne diseases, TBEV-tick-borne encephalitis virus, WNV-West Nile virus, CCHFV-Crimean Congo hemorrhagic fever virus, TBP's tick-borne pathogens, PTEP-professionally tick-exposed persons, HCW-health care workers, GP-general population.
